# Supplementary material for: Lower dietary phosphorus supply in pigs match both animal welfare aspects and resource efficiency
Source: Springer Nature journal article supplement (doi:10.1007/s13280-017-0969-8), 2017-11-20
Supplement: MOESM1 [file 15654950]

Ambio

**Electronic Supplementary Material**

**Title: Lower dietary phosphorus supply in pigs match both animal welfare aspects and resource efficiency**

Authors: Michael Oster, Christian Gerlinger, Kaja Heide, Franziska Just, Luisa Borgelt, Petra Wolf, Christian Polley, Brigitte Vollmar, Eduard Muráni, Siriluck Ponsuksili, Klaus Wimmers

**Table S1** Analysed composition of the experimental diets.

| <b>Item</b>               | <b>Unit</b> | <b>Low</b> | <b>Medium</b> | <b>High</b> |
|---------------------------|-------------|------------|---------------|-------------|
| Dry matter                | %           | 89.8       | 89.7          | 90.5        |
| Crude protein             | % of DM     | 19.6       | 19.6          | 19          |
| Crude ash                 | % of DM     | 4.97       | 6.15          | 7.15        |
| Calcium                   | % of DM     | 0.79       | 1.27          | 1.69        |
| Phosphorus                | % of DM     | 0.56       | 0.84          | 1.02        |
| Digestible phosphorus     | % of DM     | 0.31       | 0.49          | 0.6         |
| Calcium: phosphorus ratio |             | 1.41       | 1.51          | 1.65        |
| Phytase activity          | IU/kg       | 253        | 251           | 253         |
| Metabolisable energy      | ME: MJ/kg   | 14.7       | 14.6          | 14.3        |

**Table S2** Primer used for qPCR

| <b>Gene symbol</b> | <b>Sequence 5' - 3' For</b> | <b>Sequence 5' - 3' Rev</b> | <b>size (bp)</b> |
|--------------------|-----------------------------|-----------------------------|------------------|
| VDR                | ACCTGGATCTGAGCGAAGAA        | GATGGCACTTGACTTCAGCA        | 194              |
| Cyp24A1            | GCTGGACAACAAAATCAATGAG      | CTCATAGAGCACAAGGCAGATG      | 142              |
| Cyp27A1            | GGCCCTGTACCATCTTTCAA        | TTGTCTGTGATGACCCTGGA        | 192              |
| Cyp27B1            | GCATCTCTCCCCTTTGGCTT        | GGGTCATGGGTCTGATTGGG        | 145              |
| PTH1R              | GGCGTCCATTACATCGTCTT        | AAAGTCCAGTGCCAATGTCC        | 198              |
| THRA               | TGGAAAGCGAAAAAGAAAGAAC      | TGAGTAGGTGGGATGGAGATTC      | 202              |
| SLC34A1            | TGGGCTTGTGTGACTGAGAG        | CCCAGTCAGAGTTGTGCGTA        | 198              |
| SLC34A2            | GAATCAGCCCGAAACAAGAG        | AAACCATCCGTCCAACAGAG        | 128              |
| SLC34A3            | TCGTCCTGGTCACAGTCC          | CGGGGTTCTCATAGCAGTG         | 192              |
